# Predictors of Diabetic Foot and Leg Ulcers in a Developing Country with a Rapid Increase in the Prevalence of Diabetes Mellitus

Kumarasinghe A. Sriyani<sup>1</sup>, Sudharshani Wasalathanthri<sup>2\*</sup>, Priyadharshika Hettiarachchi<sup>3</sup>, Shamini Prathapan<sup>4</sup>

**1** Department of Health Sciences, the Open University of Sri Lanka, Nawala, Sri Lanka, **2** Department of Physiology, University of Colombo, Colombo, Sri Lanka, **3** Department of Physiology, University of Sri Jayewardenepura, Gangodawila, Nugegoda, Sri Lanka, **4** Department of Community Medicine, University of Sri Jayewardenepura, Gangodawila, Nugegoda, Sri Lanka

## Abstract

**Objective:** To identify the socio demographic, life style and foot examination related predictors of diabetic foot and leg ulcers with a view to develop a screening tool appropriate for the use in an outpatient setting.

**Research design and methods:** This cross sectional study included type 2 diabetes mellitus (DM) patients; 88 subjects with leg and foot ulcers and 80 non ulcer controls. Socio demographic data and life style factors were documented. Foot was examined for skin changes and structural abnormalities. Distal peripheral neuropathy was assessed by pressure sense, vibration sense and joint position sense. Multivariate analysis by logistic regression was used to determine the significant predictors in screening for foot ulcers.

**Results:** Education of grade 6 and below (OR - 1.41, 95% CI; 1.03 - 4.68), low income (OR - 23.3, 95% CI; 1.5 - 34.0), impaired vibration sense (OR - 24.79, 95% CI; 9.3 - 66.2), abnormal monofilament test on first (OR - 1.69, 95% CI; 1.36 - 16.6), third (OR - 3.4, 95% CI; 1.1 - 10.6) and fifth (OR - 1.8, 95% CI; 1.61- 12.6) toes are found to be predictors of increased risk whereas incidental diagnosis of DM (OR - 0.03, 95% CI; 0.003 - 0.28), wearing covered shoes (OR - 0.003, 95% CI; 0.00 - 0.28), presence of normal skin color (OR - 0.01, 95% CI; 0.001 - 0.14) and normal monofilament test on first metatarsal head (OR - 0.10, 95% CI; 0.00 - 0.67) are protective factors for ulcers.

**Conclusions:** Ten independent risk and protective factors identified in this study are proposed as a simple screening tool to predict the risk of developing leg and foot ulcers in patients with DM.

**Citation:** Sriyani KA, Wasalathanthri S, Hettiarachchi P, Prathapan S (2013) Predictors of Diabetic Foot and Leg Ulcers in a Developing Country with a Rapid Increase in the Prevalence of Diabetes Mellitus. PLoS ONE 8(11): e80856. doi:10.1371/journal.pone.0080856

**Editor:** Massimo Pietropaolo, University of Michigan Medical School, United States of America

**Received:** July 30, 2013; **Accepted:** October 8, 2013; **Published:** November 6, 2013

**Copyright:** © 2013 Sriyani et al. This is an open-access article distributed under the terms of the Creative Commons Attribution License, which permits unrestricted use, distribution, and reproduction in any medium, provided the original author and source are credited.

**Funding:** The study was funded by the University of Sri Jayewardenepura - Grant number ASP/06/RE/MED/2012/35. The funders had no role in study design, data collection and analysis, decision to publish, or preparation of the manuscript.

**Competing interests:** The authors have declared that no competing interests exist.

\* E-mail: sudharshaniw@gmail.com

## Introduction

Diabetes mellitus (DM), especially if uncontrolled, eventually leads to chronic complications with a significant proportion of patients having some complication even at the time of diagnosis [1]. Among the complications, diabetic ulcer disease has gained importance because of the socioeconomic burden it imposes on the patient, the patient's family and on the health care system of the country. In UK and USA the prevalence of foot ulceration due to diabetes has found to be 5-7% [2] and 6% [3] respectively, whereas in the developing countries it has shown a higher percentage [4,5]. In Sri Lanka, one third of type 2 diabetes patients have a risk of foot ulceration with some progressing to limb amputations [6].

Distal peripheral neuropathy (DPN) is reported to be an important cause of diabetic ulcer disease [7,8]. Although obesity, presence of hypertension, high serum cholesterol and alcohol consumption were identified as predictors of DPN in the developed region, in a national study including all provinces of Sri Lanka, these factors were not identified as predictors [9]. In this, which studied 528 subjects, rural residence and low household monthly income (<Sri Lankan Rupees (LKR) 12,000) revealed an association with DPN implying that the risk factors for foot ulcers in the developed world might be different to the Asian and South Asian region. In the South Asian region, poverty and poor educational level [8] contribute directly or indirectly to every health hazard. It may be that factors like

inappropriate foot wear, duration of diabetes and poor glycaemic control might be more important in this region.

The American Diabetes Association in its position statement - 2008 [10] recommends peripheral neuropathy screening at diagnosis of diabetes and at least annually thereafter, using simple clinical tests. Although DPN screening is a widely researched area, the findings show significant variation. Some authors have shown the effectiveness of single tests - assessment of the vibration sense [11], vibration perception threshold [12] and the pressure sensation using the 5.7/10g Semmes-Weinstein (SW) monofilament test [13], while others have shown the effectiveness of them when used in combination [14,15]. SW monofilament test is shown to be a simple, valid clinical tool for detecting neuropathy but requires a consensus on the protocol to be used [16] as the number of sites tested by monofilament vary widely between one site [15] up to ten [17,18]. However, none of these studies have shown these as predictors of foot ulcers, as diabetic ulcer disease seems to have a complicated aetiology, to which a number of structural, pathophysiological, behavioral and environmental factors contribute [19]. Longer duration of diabetes and poor level of education [8], prolonged hyperglycemia [20], inappropriate footwear [21], walking barefoot [22], weak pedal pulses [23], skin changes of the foot [21], presence of callus [24], Charcot deformity [25] and reduced ankle mobility [26] are some of the other common factors documented.

Due to devastating impact diabetic ulcers pose on the quality of life of the patients and the health care costs of a country, it is crucial to identify the at risk group for occurrence of ulcers, give them appropriate health education and monitor them closely with a view to prevent ulcer formation. Therefore, the aim of this study is to identify the socio demographic, life style and foot examination related predictors with a view to develop a simple and cost effective screening tool which is appropriate to be practiced in the outpatient settings. Urgency of this task becomes imperative with the increasing prevalence of DM globally.

## Materials and Methods

### Ethics Statement

This study was approved by the Ethics review committees of University of Sri Jayawardenepura and Colombo South Teaching Hospital (CSTH).

Data were collected from type 2 DM subjects attending the Out Patient Department of the CSTH, Sri Lanka. Eighty eight subjects with leg and foot ulcers and 80 non ulcer controls were studied. Previously diagnosed DM subjects were identified and the diagnosis was confirmed by medical records. Subjects consenting to the study were recruited on a consecutive basis. The nature of the study was explained to the subjects prior to obtaining written informed consent. Subjects with leg and foot ulcers with an ulcer size not less than 2.5 cm<sup>2</sup>, Wagner scale two (scale 2 = ulcers extending into tendon, bone, or capsule) or three (scale 3 = deep ulcer with osteomyelitis, or abscess leg or foot ulcers ) and ulcer duration more than one week and less than six months were included in the study group. Subjects with cognitive impairment

were excluded from both the study and control groups. Data on socio demographic factors (sex, age, education, household income) and diabetic and life style factors (duration of DM, mode of diagnosis, type of treatment, family history of DM, smoking, alcohol and type of footwear) were collected by an interviewer administered questionnaire. Physical examination of the lower limb was performed. Foot was examined for skin changes (dry/ cracked skin, skin discoloration and callus), and structural abnormalities (hammer toes, bunions and flat foot).

### Neuropathy assessment

Presence of DPN was assessed by testing the pressure sense, vibration sense and joint position sense. All tests were demonstrated to the subjects prior to the assessment of sensory modalities and they were performed while the subjects closed their eyes.

Vibration sense was assessed by applying a 128-Hz vibrated tuning fork over the halluces. Subjects were asked to say 'yes' every time they perceived vibrations. If the subject was unable to perceive vibration sense while the examiner still perceives it, the test was recorded as abnormal. Test was repeated three times. If the subject did not indicate the result correctly for 2 or more times the test was reported as impaired.

Position sense was assessed by moving the great toe for 10° at inter phalangeal joint. Test was performed by flexing the great toe dorsally and ventrally while lightly grasping either sides with the thumb and the index finger of the investigator. Subjects were asked to indicate the position of the great toe as 'up' or 'down'. If the subject was unable to indicate the direction of the great toe correctly, the test was recorded as abnormal. Test was repeated three times. If the test was abnormal for 2 or more times, it was reported as impaired.

Pressure sensation was assessed by applying the SW monofilament at ten sites (9 sites on the plantar surface of the foot; first toe, third toe, fifth toe, first metatarsal head, third metatarsal head, fifth metatarsal head, medial mid foot, lateral mid foot and heel, and 1 site on the dorsal surface between the base of the first and the second toe). Monofilament was pressed perpendicularly to the test site till it buckled and the pressure was exerted for two seconds. Subjects were asked to say 'yes' every time they perceive the pressure sensation at each site and test was repeated three times. At a given site, if the subject did not feel the sensation for 2 or more times the test was reported as abnormal. The pressure sensation was considered impaired, if the test was abnormal at any one or more sites.

### Statistical analysis

We compared differences of cases and controls using univariate analysis and calculated the odds ratios (ORs) and 95% CIs for socio demographic factors, diabetes and life style factors and findings of foot examination. Then multivariate analysis by logistic regression was performed to find significant variables for the final model for screening for foot ulcers. Data analysis was performed using statistical package for social sciences (SPSS) software (Version 19). 95% confidence was used for the determination of significance of probabilities.

**Table 1.** Socio demographic factors.

| Category                       | Subcategory       | Controls  |           | OR   | 95% CI       |
|--------------------------------|-------------------|-----------|-----------|------|--------------|
|                                |                   | Cases (%) | (%)       |      |              |
| Sex                            | Male              | 43 (48.9) | 25 (31.2) | 2.1  | 1.11 - 3.91  |
|                                | Female            | 45 (51.1) | 55 (68.8) |      |              |
| Age (years)                    | ≤ 50              | 28 (31.8) | 18 (22.5) | 1.6  | 0.81 - 3.2   |
|                                | > 50              | 60 (68.2) | 62 (77.5) |      |              |
| Education                      | Grade 6 and below | 22 (25.0) | 6 (7.5)   | 4.1  | 1.57 - 10.76 |
|                                | Grade 7 and above | 66 (75.0) | 74 (92.5) |      |              |
| Monthly household income (LKR) | < 15,000          | 43 (48.9) | 20 (25.0) | 19.4 | 4.09 - 91.55 |
|                                | 15,000 - 50,000   | 43 (48.9) | 42 (52.5) | 9.2  | 2.06 - 42.20 |
|                                | > 50,000          | 2 (2.3)   | 18 (22.5) | -    | -            |

OR: odds ratio CI: confidence interval LKR: Sri Lankan rupees  
doi: 10.1371/journal.pone.0080856.t001

**Results**

Socio demographic, life style and foot examination related factors were compared in subjects with leg and foot ulcers and non-ulcer controls. In the univariate analysis, male sex, an education level of grade 6 and below, a monthly household income of LKR 50,000 and less were risk factors for foot ulcers in patients with DM (Table 1). A statistically significant increased risk was also observed for family history of DM and wearing slippers as opposed to sandals and covered shoes, whereas a decreased risk for foot ulcers was observed for diabetes diagnosed incidentally (OR - 0.25, 95% CI; 0.11 - 0.59) (Table 2). No consistent significant trend was observed with either smoking or alcohol. Table 3 shows the outcome of the examination of the foot. Intact vibration sense, position sense and a normal pressure sensation indicated by overall monofilament test results were statistically significant protective factors for foot ulceration. The presence of pressure sensation at first, third and fifth toes, first, third and fifth metatarsal heads, medial and lateral mid foot and dorsum was a protective factor for foot ulceration. However, presence of normal monofilament test at heel was not noteworthy.

In the multivariate analysis, significant risk factors identified were education of grade 6 and below, a monthly household income of less than LKR 15,000 (US\$ 140), impaired vibration sense, abnormal monofilament test on first toe, third toe, and fifth toe. The significant protective factors were incidental diagnosis of diabetes, wearing covered shoes and a normal monofilament test on first metatarsal head (Table 4).

**Discussion and Conclusions**

This study is the only reported study in Sri Lanka investigating the risk factors for diabetic foot ulcers. The objective of the health care team should extend beyond treating the ulcers, and attempts should be taken to prevent ulcers in

**Table 2.** Diabetic and life style factors.

| Category             | Subcategory              | Cases (%) | Controls (%) | OR   | 95% CI             |
|----------------------|--------------------------|-----------|--------------|------|--------------------|
| Duration (years)     | ≤ 20                     | 73 (83.0) | 70 (87.5)    | 0.7  | 0.29 - 1.65        |
|                      | > 20                     | 15 (17.0) | 10 (12.5)    |      |                    |
| Mode of diagnosis    | Incidental               | 35 (39.8) | 10 (12.5)    | 0.25 | <b>0.11 - 0.59</b> |
|                      | Screening                | 20 (22.7) | 33 (41.2)    | 1.47 | 0.71 - 3.04        |
|                      | Symptomatic              | 33 (37.5) | 37 (46.2)    | -    | -                  |
| Type of treatment    | Diet                     | 7 (8.0)   | 1 (1.2)      | 0.24 | 0.02 - 3.01        |
|                      | Diet and OHA             | 52 (59.1) | 61 (76.2)    | 1.96 | 0.45 - 8.58        |
|                      | Diet and OHA and Insulin | 24 (27.3) | 15 (18.8)    | 1.04 | 0.22 - 5.00        |
| Family history of DM | Diet and Insulin         | 5 (5.7)   | 3 (3.8)      | -    | -                  |
|                      | Yes                      | 51 (58.0) | 26 (32.9)    | 2.8  | <b>1.49 - 5.28</b> |
|                      | No                       | 37 (42.0) | 53 (67.1)    |      |                    |
| Smoking              | Current smoker           | 6 (14.3)  | 2 (7.4)      | 3.66 | 0.59 - 22.7        |
|                      | Ex-smoker                | 27 (64.3) | 14 (51.9)    | 2.36 | 0.79 - 7.02        |
|                      | Never smoked             | 9 (21.4)  | 11 (40.7)    | -    | -                  |
| Alcohol              | Current drinker          | 6 (14.3)  | 4 (15.4)     | 3.66 | 0.59 - 22.7        |
|                      | Ex- drinker              | 23 (54.8) | 14 (53.8)    | 2.36 | 0.79 - 7.02        |
|                      | Never drank              | 9 (21.4)  | 5 (19.2)     | -    | -                  |
|                      | Social drinker           | 4 (9.5)   | 3 (11.5)     | -    | -                  |
| Type of footwear     | Slippers                 | 65 (74.7) | 42 (55.3)    | 3.48 | <b>1.38 - 8.72</b> |
|                      | Sandals                  | 14 (16.1) | 16 (21.1)    | 1.96 | 0.65 - 5.91        |
|                      | Covered shoes            | 8 (9.2)   | 18 (23.7)    | -    | -                  |

OHA: Oral hypoglycemic agents OR: odds ratio CI: confidence interval  
doi: 10.1371/journal.pone.0080856.t002

diabetic patients. Screening to identify factors which can accurately predict those who are at risk for foot ulceration is practical in an outpatient setting in a low resource country. Since most of these factors are modifiable, identification of these will allow prevention of ulcers in patients with DM. Due to the rapid increase in prevalence of DM in Sri Lanka, the patient turnover at diabetic clinics has substantially increased over the past decade, and thus the detection of these factors should be by a simple, less time consuming tool which is preferably suitable to be administered even by a paramedical personnel.

Male sex was one potential risk factor identified in the univariate analysis and this finding is consistent with studies elsewhere [8]. High prevalence of DM in men compared to women [27] and trauma prone occupations in males especially in low income groups may be contributing to this difference. Although the presence of a family history is a known etiological factor for DM, we did not find it as an independent risk factor for the development of diabetic ulcers.

Ten factors were found to be significantly associated with the occurrence of ulcers in patients with diabetes in the multivariate analysis. Subjects with low level of education were found to have a higher risk of developing ulcers possibly due to the less likelihood of seeking treatment and the interest in life style adjustments. In fact low level of education has been suggested

**Table 3.** Examination of the foot.

| Category                                   | Sub category | Cases (%) | Controls (%) | OR (95% CI)        |
|--------------------------------------------|--------------|-----------|--------------|--------------------|
| Healthy skin                               | Yes          | 35 (39.8) | 43 (53.8)    | 0.59 (0.31 - 1.05) |
|                                            | No           | 53 (60.2) | 37 (46.2)    |                    |
| Skin dry / cracked                         | Yes          | 33 (37.5) | 35 (43.8)    | 0.77 (0.42 - 1.43) |
|                                            | No           | 55 (62.5) | 45 (56.2)    |                    |
| Skin discoloration                         | Yes          | 26 (29.5) | 3 (3.8)      | 10.7 (3.11 - 7.23) |
|                                            | No           | 62 (70.5) | 77 (96.2)    |                    |
| Callus                                     | Yes          | 23 (26.1) | 15 (18.8)    | 1.5 (0.74 - 3.20)  |
|                                            | No           | 65 (73.9) | 65 (81.2)    |                    |
| Hammer toes                                | Yes          | 14 (15.9) | 16 (20.0)    | 0.76 (0.34 - 1.67) |
|                                            | No           | 74 (84.1) | 64 (80.0)    |                    |
| Bunions                                    | Yes          | 14 (15.9) | 11 (13.8)    | 1.19 (0.51 - 2.79) |
|                                            | No           | 74 (84.1) | 69 (86.2)    |                    |
| Flat foot                                  | Yes          | 8 (9.1)   | 1 (1.2)      | 7.9 (0.97 - 64.64) |
|                                            | No           | 80 (90.9) | 79 (98.8)    |                    |
| Vibration sense                            | Intact       | 56 (63.6) | 71 (88.8)    | 0.22 (0.10 - 0.50) |
|                                            | Impaired     | 32 (36.4) | 9 (11.2)     |                    |
| Position sense                             | Intact       | 73 (84.9) | 76 (95.0)    | 0.30 (0.09 - 0.94) |
|                                            | Impaired     | 13 (15.1) | 4 (5.0)      |                    |
| Pressure sense (overall monofilament test) |              |           |              |                    |
|                                            | Normal       | 27 (31.0) | 51 (63.8)    | 0.26 (0.13 - 0.49) |
|                                            | Abnormal     | 60 (69.0) | 29 (36.2)    |                    |
| Monofilament test of ten sites*            |              |           |              |                    |
| No. 1                                      | Normal       | 30 (35.7) | 61 (76.2)    | 0.17 (0.08 - 0.34) |
|                                            | Abnormal     | 54 (64.3) | 19 (23.8)    |                    |
| No. 2                                      | Normal       | 40 (46.5) | 68 (86.1)    | 0.14 (0.06 - 0.32) |
|                                            | Abnormal     | 46 (53.5) | 11 (13.9)    |                    |
| No. 3                                      | Normal       | 55 (64.0) | 67 (83.8)    | 0.34 (0.16 - 0.72) |
|                                            | Abnormal     | 31 (36.0) | 13 (16.2)    |                    |
| No. 4                                      | Normal       | 47 (55.3) | 61 (76.2)    | 0.38 (0.19 - 0.75) |
|                                            | Abnormal     | 38 (44.7) | 19 (23.8)    |                    |
| No. 5                                      | Normal       | 55 (65.5) | 66 (82.5)    | 0.40 (0.19 - 0.84) |
|                                            | Abnormal     | 29 (34.5) | 14 (17.5)    |                    |
| No. 6                                      | Normal       | 59 (71.1) | 72 (90.0)    | 0.27 (0.11 - 0.65) |
|                                            | Abnormal     | 24 (28.9) | 8 (10.0)     |                    |
| No.7                                       | Normal       | 69 (79.3) | 74 (92.5)    | 0.31 (0.12 - 0.83) |
|                                            | Abnormal     | 18 (20.7) | 6 (7.5)      |                    |
| No. 8                                      | Normal       | 68 (79.1) | 75 (93.8)    | 0.25 (0.09 - 0.72) |
|                                            | Abnormal     | 18 (20.9) | 5 (6.2)      |                    |
| No. 9                                      | Normal       | 68 (78.2) | 62 (77.5)    | 1.03 (0.50 - 2.16) |
|                                            | Abnormal     | 19 (21.8) | 18 (22.5)    |                    |
| No.10                                      | Normal       | 60 (69.0) | 75 (93.8)    | 0.15 (0.05 - 0.41) |
|                                            | Abnormal     | 27 (31.0) | 5 (6.2)      |                    |

OR: odds ratio CI: confidence interval

\*. Sites: 1. First toe; 2. Second toe; 3.Third toe; 4. First metatarsal head; 5. Third metatarsal head; 6. Fifth metatarsal head; 7. Medial mid foot; 8. Lateral mid foot; 9.Heel; 10. Dorsum

doi: 10.1371/journal.pone.0080856.t003

for increasing prevalence of DM in the rural sector of Sri Lanka [28], and DPN in UAE [8] both contributing to foot ulceration. A family monthly household income of less than LKR 15000 was another factor identified in this study which increases the risk of developing an ulcer (OR: 23.3; 95% CI 1.5-34.0). This finding is supported by a national study showing that DPN is associated

**Table 4.** Adjusted OR with significant variables for the final model for screening for foot ulcers.

| Variables for screening                                     | Adjusted OR | 95% CI       |
|-------------------------------------------------------------|-------------|--------------|
| Education of grade 6 and below                              | 1.41        | 1.03 - 4.68  |
| Income less than LKR 15,000 (US\$ 140)                      | 23.3        | 1.5 - 34.0   |
| Incidental diagnosis of DM                                  | 0.03        | 0.003 - 0.28 |
| Wearing covered shoes                                       | 0.003       | 0.00 - 0.28  |
| Normal skin color                                           | 0.01        | 0.001 - 0.14 |
| Impaired vibration sense                                    | 24.798      | 9.3 - 66.2   |
| Abnormal monofilament test on 1 <sup>st</sup> toe           | 1.69        | 1.36 - 16.6  |
| Abnormal monofilament test on 3 <sup>rd</sup> toe           | 3.4         | 1.1 - 10.6   |
| Abnormal monofilament test on 5 <sup>th</sup> toe           | 1.8         | 1.61 - 12.6  |
| Normal monofilament test on 1 <sup>st</sup> metatarsal head | 0.10        | 0.00 - 0.67  |

OR: odds ratio CI: confidence interval LKR: Sri Lankan rupees

doi: 10.1371/journal.pone.0080856.t004

with residence in rural areas and with a low household income [9] suggesting that the extreme poor may be having less opportunity for health services. Although the association of the durations of DM and DPN were reported previously [8,29-32], our findings are not in agreement probably because the true duration might be much longer than the duration calculated from the time of diagnosis. However, we found that the diagnosis of DM being incidental as a protective factor against ulcer formation. We also found that wearing slippers as opposed to sandals and covered shoes increases the risk of foot ulceration about 3-4 times. This is supported by a previous finding suggesting the use of appropriate footwear and wearing them indoors as well as outdoors to prevent foot ulcers [22].

In general examination of the foot, skin discoloration was found to be the only significant predictor of foot ulceration in our study population. Plantar callus [24] and hammer/claw toe deformity [25] were reported to be strong predictors of foot ulceration in previous studies investigating 63 and 749 DM patients respectively. However, we did not find any association with these probably due to differences in walking habits of study populations.

Although DPN is reported to be the predominant root cause of diabetic foot ulceration, the diagnosis is complicated and requires the assessment of multiple features [21]. Different symptom scores have been used extensively in previous studies [31-33]. We did not advocate them because neuropathic sensory symptoms do not always accurately detect DPN in patients with type 2 DM [34] and sometimes they are subjective and correlate poorly with other tests [35]. Instead, our aim was to test for three sensory modalities using basic clinical skills and simple equipment with a view to find their suitability in identifying DM patients at risk for foot ulceration. Although impairment of all three sensations appeared to be significant risk factors for ulceration in the univariate analysis, only the impairment of vibration and pressure sensations were significant in the final model. Several previous reports have shown the value of using 128-Hz tuning fork alone [11] or in combination with 10g SW monofilament test [36]. In relation to our findings, impaired vibration sense is a very strong predictor of diabetic ulceration (OR: 24.7; 95% CI 9.3-66.2). The use of

SW monofilament test is found to be an ideal, sensitive, easily learned, simple, inexpensive and less time consuming screening tool to assess DPN [17,36,37]. Although various combination of sites are suggested [17,18,37,38], we found that the presence of an abnormal monofilament test on 1<sup>st</sup>, 3<sup>rd</sup>, and 5<sup>th</sup> toes significantly increases the ulcer risk by 1.69, 3.4 and 1.8 fold respectively recommending these 3 out of 10 sites to be used in screening. The finding of a normal monofilament test on the first metatarsal head strengthens the predictive value of the screening tool as it is found to be an independent protective factor. This is in agreement with the suggestion of including 1<sup>st</sup> metatarsal head as a common site of screening in previous studies [18,36]. Although nerve conduction studies are the gold standard to detect DPN, they are not cost effective to be used in a low resource country as ours and further, they are impractical in a primary care setting.

In summary, we have identified 10 independent risk and protective factors which can be used in a simple screening tool suitable for screening all DM patients to predict the risk of

developing leg and foot ulcers. However, the possibility that ulceration may have influenced the occurrence of some of the factors identified in the tool is a limitation which has to be resolved by a prospective study. Training the staff to administer the tool is suggested to minimize the inter-observer variability. Although glycaemic control is known to reduce the incidence of DPN, it was not considered due to practical limitations in outpatient settings. Future study is planned to validate this tool for our population.

## Author Contributions

Conceived and designed the experiments: KAS SW PH SP. Performed the experiments: KAS. Analyzed the data: KAS SW PH SP. Contributed reagents/materials/analysis tools: KAS SW PH SP. Wrote the manuscript: KAS SW PH SP. Revised the manuscript and final approval of the version to be published: KAS SW PH SP.

## References

- Weerasuriya N, Siribaddana S, Dissanayake A, Subasinghe Z, Wariyapola D et al. (1998) Long-term complications in newly diagnosed Sri Lankan patients with type 2 diabetes mellitus. *Q J Med* 91:439-443. PubMed: 9709462
- Kerr M (2012) Foot care for people with diabetes: The economic case for change. Retrieved unpublished at whilst December year 1111 from Diabetes.org.uk website. Available: <https://www.diabetes.org.uk/Documents/nhs-diabetes/footcare/footcare-for-people-with-diabetes.pdf>. Accessed 2013 May 12.
- Margolis DJ, Malay DS, Hoffstad OJ et al. (2011) Incidence of diabetic foot ulcer and lower extremity amputation among Medicare beneficiaries, 2006 to 2008: Data Points #2. 2011 Feb 17. In: Data Points Publication Series [Internet]. Rockville (MD): Agency for Healthcare Research and Quality (US). NCBI website. Available: <http://www.ncbi.nlm.nih.gov/books/NBK63602/pdf/dp1.pdf>. Accessed 2013 May 12
- Boulton A (2005) The diabetic foot: Epidemiology, risk factors, and the status of care. *Diabetes VOICE* 50 (SI):5-7
- Riaz M, Miyan Z, Zaidi SI, Alvi SF, Fawwad A et al. (2012) Characteristics and outcomes of subjects with diabetic foot ulceration. *Diabetes Care*. Diabetes Care website. Available: <http://care.diabetesjournals.org/content/35/9/e63.full.pdf+html>. Accessed 2013 April 30.
- Fernando DJ (1996) The prevalence of neuropathic foot ulceration in Sri Lankan diabetic patients. *Ceylon Med J* 41: 96-98. PubMed: 8917968.
- Chalya PL, Mabula JB, Dass RM, Kabangila R, Jaka H et al. (2011) Surgical management of diabetic foot ulcers: a Tanzanian university teaching hospital experience. *BMC Res Notes* 4: 365-365. Biomed central website. Available: <http://www.biomedcentral.com/content/pdf/1756-0500-4-365.pdf>. Accessed 2013 Feb 5 PubMed: 21943342.
- Al-Maskari F, El-Sadig M (2007) Prevalence of risk factors for diabetic foot complications. *BMC Fam Pract* 8: 59-59. Biomed central website. Available: <http://www.biomedcentral.com/content/pdf/1471-2296-8-59.pdf>. Accessed 2013 June 20 PubMed: 17927826.
- Katulanda P, Ranasinghe P, Jayawardena R, Constantine GR, Sheriff MH et al. (2012) The prevalence, patterns and predictors of diabetic peripheral neuropathy in a developing country. *Diabetol Metab Syndr* 4:21. Biomed central website. Available: <http://www.ncbi.nlm.nih.gov/pmc/articles/PMC3408375/pdf/1758-5996-4-21.pdf>.
- American Diabetes Association (2008) Standards of Medical Care in Diabetes. *Diabetes Care* 31: S12-S54. doi:10.2337/dc08-S012. PubMed: 18165335.
- Meijer JW, Smit AJ, Lefrandt JD, van der Hoeven JH, Hoogenberg K (2005) Back to basics in diagnosing diabetic polyneuropathy with the tuning fork! *Diabetes Care* 28: 2201-2205. doi:10.2337/diacare.28.9.2201. PubMed: 16123490.
- Young MJ, Breddy JL, Veves A, Boulton AJ (1994) The prediction of diabetic neuropathic foot ulceration using vibration perception thresholds: a prospective study. *Diabetes Care* 17: 557-560. doi: 10.2337/diacare.17.6.557. PubMed: 8082524.
- Ikem RT, Ikem IC (2009) Screening and identifying diabetic patients at risk of foot ulceration: use of the Semes-Weinstein monofilament. *Mera Diabetes International*: 15-17.
- Shin JB, Seong YJ, Lee HJ, Kim SH, Park JR (2000) Foot screening technique in a diabetic population. *J Korean Med Sci* 15: 78-82. PubMed: 10719814.
- Pham H, Armstrong DG, Harvey C, Harkless LB, Giurini JM et al. (2000) Screening techniques to identify people at high risk for diabetic foot ulceration: a prospective multicenter trial. *Diabetes Care* 23: 606-611. doi:10.2337/diacare.23.5.606. PubMed: 10834417.
- Tan LS (2010) The clinical use of the 10g monofilament and its limitations: a review (Abstract) *Diabetes Res Clin Pract* 90: 1-7. Elsevier website. Available: <http://zl.elsevier.es/en/revista/-pdf/90036415/S300/>. Accessed 2013 March 10 doi:10.1016/j.diabres.2010.06.021. PubMed: 20655123.
- Lee S, Kim H, Choi S, Park Y, Kim Y et al. (2003) Clinical usefulness of the two-site Semmes-Weinstein monofilament test for detecting diabetic peripheral neuropathy. *J Korean Med Sci* 18: 103-107. PubMed: 12589096.
- McGill M, Molyneaux L, Spencer R, Heng LF, Yue DK (1999) Possible sources of discrepancies in the use of the Semmes-Weinstein monofilament: impact on prevalence of insensate foot and workload requirements. *Diabetes Care* 22: 598-602. doi:10.2337/diacare.22.4.598. PubMed: 10189538.
- Reiber GE, Vileikyte L, Boyko EJ, del Aguila M, Smith DG et al. (1999) Causal pathways for incident lower-extremity ulcers in patients with diabetes from two settings. *Diabetes Care* 22: 157-162. doi:10.2337/diacare.22.1.157. PubMed: 10333919.
- Boulton AJ, Malik RA, Arezzo JC, Sosenko JM (2004) Diabetic somatic neuropathies. *Diabet Care* 27: 1458-1486. doi:10.2337/diacare.27.6.1458.
- Mayfield JA, Reiber GE, Sanders LJ, Janisse D, Pogach LM (1998) Preventive foot care in people with diabetes. *Diabet Care* 21: 2161-2177. doi:10.2337/diacare.21.12.2161. PubMed: 125026239839111.
- Jayasinghe SA, Atukorala I, Gunethilleke B, Siriwardena V, Herath SC et al. (2007) Is walking barefoot a risk factor for diabetic foot disease in developing countries? *Rural Remote Health* 7:692. Rural remote health website. Available: [http://www.rrh.org.au/publishedarticles/article\\_print\\_692.pdf](http://www.rrh.org.au/publishedarticles/article_print_692.pdf). Accessed 2013 May 12
- Abbott CA, Carrington AL, Ashe H, Bath S, Every LC, Griffiths J et al. (2002) The North-West diabetes foot care study: incidence of, and risk factors for, new diabetic foot ulceration in a community-based patient cohort. *Diabet Med* 19: 377-384. doi:10.1007/BF02697143. PubMed: 12027925.

24. Murray HJ, Young MJ, Hollis S, Boulton AJ (1996) The association between callus formation, high pressures and neuropathy in diabetic foot ulceration. *Diabet Med* 13: 979-982. doi:10.1002/(SICI)1096-9136(199611)13:11. PubMed: 8946157.
25. Boyko EJ, Ahroni JH, Stensel V, Forsberg RC, Davignon DR et al. (1999) A prospective study of risk factors for diabetic foot ulcer: The Seattle diabetic foot study. *Diabetes Care* 22: 1036-1042. doi:10.2337/diacare.22.7.1036. PubMed: 10388963.
26. Giacomozzi C, D'Ambrogio E, Cesinaro S, Macellari V, Uccioli L (2008) Muscle performance and ankle joint mobility in long-term patients with diabetes. *BMC Musculoskelet Disor* 9: 99-99. Biomed central website. Available: <http://www.ncbi.nlm.nih.gov/pmc/articles/PMC2453126/pdf/1471-2474-9-99.pdf>. Accessed 2013 June 28 PubMed: 18601723.
27. Wijewardene K, Mohideen MR, Mendis S, Fernando DS, Kulathilaka T et al. (2005) Prevalence of hypertension, diabetes and obesity: baseline findings of a population based survey in four provinces in Sri Lanka. *Ceylon Med J* 50: 62-70. PubMed: 16114771.
28. Illangasekera U, Rambodagalla S, Tennakoon S (2004) Temporal trends in the prevalence of diabetes mellitus in a rural community in Sri Lanka. *J R Soc Promot Health* 124: 92-94. doi: 10.1177/146642400412400214. PubMed: 15067982.
29. Mørkrid K, Ali L, Hussain A (2010) Risk factors and prevalence of diabetic peripheral neuropathy: a study of type 2 diabetic outpatients in Bangladesh. *Int J Diabetes Dev Ctries* 30: 11-17. doi: 10.4103/0973-3930.60004. PubMed: 20431800.
30. Booya F, Bandarian F, Larijani B, Pajouhi M, Nooraei M et al. (2005) Potential risk factors for diabetic neuropathy: a case control study. *BMC Neurol* 5: 24-24. Biomed central website. Available: <http://www.biomedcentral.com/content/pdf/1471-2377-5-24.pdf>. Accessed on 2013 June 10 PubMed: 16336693.
31. Kiani J, Moghimbeigi A, Azizkhani H, Kosarifard S (2013) The prevalence and associated risk factors of peripheral diabetic neuropathy in Hamedan, Iran. *Arch Iran Med* 16: 17-19. PubMed: 23273229.
32. Dutta A, Naorem S, Singh TP, Wangjam K (2005) Prevalence of peripheral neuropathy in newly diagnosed type 2 diabetics mellitus. *Int J Diabetes Developing Countries* 25: 30-33. doi: 10.4103/0973-3930.26756.
33. Asad A, Hameed MA, Khan UA, Butt MU, Ahmed N et al. (2009) Comparison of nerve conduction studies with diabetic neuropathy symptom score and diabetic neuropathy examination score in type-2 diabetics for detection of sensorimotor polyneuropathy. *J Pak Med Assoc* 59: 594-598. PubMed: 19750851.
34. Franse LV, Valk GD, Dekker JH, Heine RJ, van Eijk JT. (2000) "Numbness of the feet" is a poor indicator for polyneuropathy in Type 2 diabetic patients. *Diabet Med* 17: 105-110. doi:10.1046/j.1464-5491.2000.00223.x. PubMed: 10746479.
35. Forouzandeh F, Aziz Ahari A, Abolhasani F, Larijani B (2005) Comparison of different screening tests for detecting diabetic foot neuropathy. *Acta Neurol Scand* 112: 409-413. doi:10.1111/j.1600-0447.2005.00663.x. PubMed: 16281925.
36. Al-Geffari M (2012) Comparison of different screening tests for diagnosis of diabetic peripheral neuropathy in Primary Health Care setting. *Int J Health Sci*, 6: 127-34 (Qassim) 6:109-115 PubMed: 23580893.
37. Kumar S, Fernando DJ, Veves A, Knowles EA, Young MJ et al. (1991) Semmes-Weinstein monofilaments: a simple, effective and inexpensive screening device for identifying diabetic patients at risk of foot ulceration. *Diabetes Res Clin Pract* 13: 63-67. doi: 10.1016/0168-8227(91)90034-B. PubMed: 1773715.
38. Boulton AJ, Armstrong DG, Albert SF, Frykberg RG, Hellman R et al. (2008) Comprehensive foot examination and risk assessment: a report of the Task of the Foot Care Interest Group of the American Diabetes Association, with endorsement by the American Association of Clinical Endocrinologists. *Diabetes Care* 31: 1679-1685. doi:10.2337/dc08-9021. PubMed: 18663232.
